# Supplementary material
Source: Springer Nature journal article supplement (https://www.springermedizin.de/resource/supplementary/12882_2013_924_MOESM11_ESM.pdf/9454040)

**A**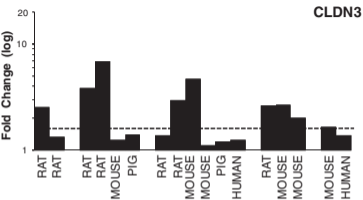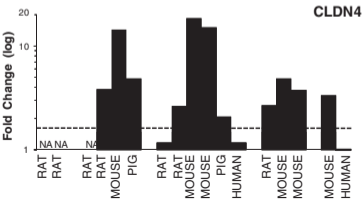**B**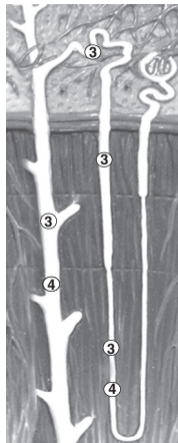**C**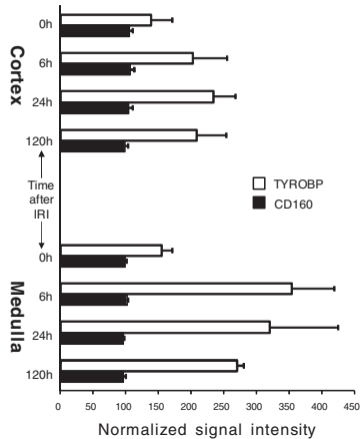

Supplement: MOESM11 [file 9454040]
